# Supplementary material for: Do Knee Pain Phenotypes Have Different Risks of Total Knee Replacement?
Source: PubMed Central journal article supplement (PMC7141124; doi:10.3390/jcm9030632), 2020-02-27
Supplement: jcm-09-00632-s001.pdf [file jcm-09-00632-s001.pdf]

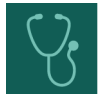

## Supplementary

**Table 1.** Goodness of fit indices and posterior probabilities of latent class analysis.

| #Latent classes | AIC  | BIC  | Consistent AIC | Log-likelihood | Mean posterior probabilities  |
|-----------------|------|------|----------------|----------------|-------------------------------|
| 2               | 3484 | 3699 | 3743           | -8931          | 0.79/0.88                     |
| 3               | 3374 | 3698 | 3764           | -8854          | 0.75/0.79/0.82                |
| 4               | 3335 | 3770 | 3857           | -8812          | 0.68/0.78/0.78/0.80           |
| 5               | 3296 | 3841 | 3950           | -8771          | 0.71/0.72/0.75/0.77/0.80      |
| 6               | 3280 | 3935 | 4066           | -8741          | 0.70/0.71/0.73/0.74/0.80/0.83 |
